# Supplementary material
Source: Springer Nature journal article supplement (https://www.springermedizin.de/resource/supplementary/12879_2013_3003_MOESM9_ESM.pdf/9446776)

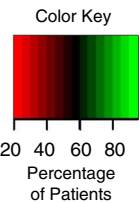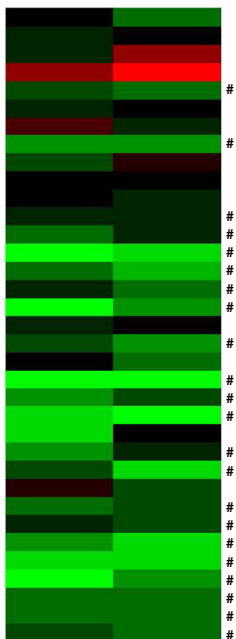

D0 vs M1

D0 vs M6

EDS-1

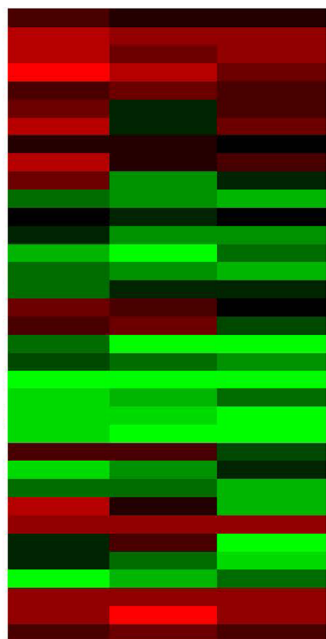

D0 vs M1

D0 vs M2

D0 vs M6

QS

Molecular  
Feature

|          |    |
|----------|----|
| 681.3793 |    |
| 329.2206 |    |
| 287.1737 | C1 |
| 174.0636 | *  |
| 311.2105 |    |
| 287.1736 |    |
| 610.3365 | C2 |
| 329.2574 |    |
| 317.2208 |    |
| 245.1636 |    |
| 285.1334 | C3 |
| 688.2028 |    |
| 566.2683 |    |
| 263.1124 |    |
| 167.0591 |    |
| 359.2308 |    |
| 170.1420 | C4 |
| 364.2243 |    |
| 231.1831 |    |
| 496.2014 |    |
| 202.1326 |    |
| 137.0480 |    |
| 874.3500 |    |
| 421.2050 |    |
| 583.2573 | C5 |
| 286.2374 |    |
| 311.1239 | *  |
| 315.2421 |    |
| 159.1263 | C6 |
| 200.1527 |    |
| 655.1932 | C7 |
| 246.0865 |    |
| 301.2267 | C8 |
| 315.2050 |    |
| 313.2265 | C9 |

Supplement: MOESM9 [file 9446776]
